# Supplementary material
Source: Springer Nature journal article supplement (https://www.springermedizin.de/resource/supplementary/12916_2013_888_MOESM18_ESM.pdf/9598866)
Supplement: MOESM18 [file 9598866]

| Adult Causes                                                                                   | Tariff |        | SSP    |        | RF     |        | PCVA   |        | InterVA |        |
|------------------------------------------------------------------------------------------------|--------|--------|--------|--------|--------|--------|--------|--------|---------|--------|
|                                                                                                | No HCE | HCE    | No HCE  | HCE    |
|                                                                                                | Median  | Median |
| <strong>GBD Cause Group A: Communicable, maternal, neonatal and nutritional disorders</strong> |        |        |        |        |        |        |        |        |         |        |
| AIDS                                                                                           | 97.9   | 97.8   | 98.4   | 98.5   | 96.3   | 97.9   | 96.4   | 97.3   | 96.7    | 96.9   |
| Diarrhea/Dysentery                                                                             | 96.7   | 97.7   | 96.5   | 97.9   | 97.3   | 97.6   | 98.1   | 99.2   | 99.7    | 99.7   |
| Malaria                                                                                        | 95.4   | 96.1   | 97.3   | 97.8   | 98.3   | 98.4   | 97     | 98.6   | 97.9    | 97.8   |
| Maternal                                                                                       | 98.8   | 99.3   | 98     | 98.5   | 98.9   | 99.2   | 98.9   | 99.4   | 99.8    | 99.7   |
| Other Infectious Diseases                                                                      | 98.9   | 98.8   | 99.5   | 99.8   | 97.5   | 98.1   | 96     | 97.4   | 97.5    | 97.9   |
| Pneumonia                                                                                      | 98.8   | 98.6   | 99.6   | 99.9   | 96.1   | 96.9   | 95.7   | 98.4   | 87.8    | 88.5   |
| TB                                                                                             | 98.8   | 98.1   | 98.1   | 98.1   | 98.1   | 98.2   | 96.8   | 97.7   | 95.6    | 95.8   |
| <strong>GBD Cause Group B: Non-communicable diseases</strong>                                  |        |        |        |        |        |        |        |        |         |        |
| Acute Myocardial Infarction                                                                    | 96     | 98.7   | 97.8   | 99.2   | 97.7   | 98.5   | 97     | 97.6   | 97.7    | 97.8   |
| Asthma                                                                                         | 96.8   | 97.2   | 98.7   | 98.5   | 99.5   | 99.2   | 99.5   | 99.1   | 98.9    | 98.9   |
| Breast Cancer                                                                                  | 99.1   | 99.4   | 99.2   | 99.1   | 99.6   | 99.6   | 99.4   | 99.8   | 99.4    | 99.5   |
| Cervical Cancer                                                                                | 97.8   | 98.8   | 97.7   | 98     | 98.9   | 99.2   | 99.6   | 99.8   | 98      | 98.2   |
| Cirrhosis                                                                                      | 99.4   | 98.5   | 97.1   | 98.5   | 97.4   | 97.4   | 97.4   | 98.7   | 99.1    | 98.6   |
| Colorectal Cancer                                                                              | 99.1   | 99.8   | 97.9   | 98.1   | 99.3   | 99.3   | 99.3   | 99.7   |         |        |
| COPD                                                                                           | 98.2   | 98.9   | 98.6   | 98.9   | 98.7   | 98.8   | 98.4   | 98.4   | 98.9    | 98.6   |
| Diabetes                                                                                       | 95.8   | 96.3   | 96.4   | 96     | 95.4   | 96.1   | 97.9   | 96.5   | 98.8    | 98.7   |
| Epilepsy                                                                                       | 98     | 98.2   | 97.4   | 97.9   | 98.7   | 98.8   | 99.9   | 99.7   | 99.5    | 99.6   |
| Esophageal Cancer                                                                              | 97.4   | 98.7   | 97     | 98.4   | 99     | 99.5   | 99     | 99.7   |         |        |
| Leukemia/Lymphomas                                                                             | 98.3   | 99.2   | 98.9   | 99     | 98.2   | 98.6   | 99.5   | 99.8   |         |        |
| Lung Cancer                                                                                    | 98.8   | 99.3   | 98.5   | 98.9   | 98.3   | 98.9   | 99.4   | 99.6   | 99.3    | 99.3   |
| Other Cardiovascular Diseases                                                                  | 95.7   | 97     | 97.5   | 98.3   | 95.6   | 96.8   | 96.4   | 95.9   | 92.6    | 92.9   |
| Other Non-communicable Diseases                                                                | 96.6   | 97     | 97.6   | 98.5   | 96.3   | 95.1   | 86.8   | 87.5   | 87.7    | 88.1   |
| Prostate Cancer                                                                                | 97.4   | 98.9   | 97.2   | 98.5   | 99.6   | 99.3   | 99.9   | 100    |         |        |
| Renal Failure                                                                                  | 98.8   | 98.7   | 99.7   | 99.8   | 96.7   | 97.6   | 97.1   | 98.6   | 99.9    | 99.6   |
| Stomach Cancer                                                                                 | 99.2   | 98.9   | 98.6   | 98.4   | 99.2   | 99.5   | 99.7   | 99.6   | 96.6    | 96.7   |
| Stroke                                                                                         | 97.2   | 97.9   | 98.3   | 98.9   | 96.7   | 97.2   | 97     | 97.2   | 95      | 94.5   |
| <strong>GBD Cause Group C: Injuries</strong>                                                   |        |        |        |        |        |        |        |        |         |        |
| Bite of Venomous Animal                                                                        | 99.9   | 99.9   | 99.7   | 99.8   | 99.9   | 99.9   | 99.9   | 99.9   | 99.9    | 99.9   |
| Drowning                                                                                       | 99.7   | 99.9   | 98.7   | 99     | 99.9   | 99.9   | 99.9   | 100    | 100     | 99.9   |
| Falls                                                                                          | 98.1   | 98.1   | 99     | 98.9   | 99.2   | 99     | 98.8   | 99.2   | 99.7    | 98.8   |
| Fires                                                                                          | 99.1   | 99     | 99.2   | 98.9   | 99.5   | 99.5   | 99.8   | 99.8   | 99.8    | 99.7   |
| Homicide                                                                                       | 99.1   | 99     | 98.6   | 98.6   | 99.4   | 99.4   | 98.5   | 99.2   | 97.8    | 98.1   |
| Other Injuries                                                                                 | 98.8   | 98.7   | 99.2   | 99.4   | 99.5   | 99.4   | 97.5   | 97.5   | 100     | 100    |
| Poisonings                                                                                     | 98.8   | 98.8   | 99.2   | 99.1   | 99.4   | 99.2   | 99.9   | 99.8   | 100     | 100    |
| Road Traffic                                                                                   | 99.2   | 99.1   | 99.4   | 99.5   | 99.6   | 99.6   | 99.6   | 99.5   | 98.8    | 98.8   |
| Suicide                                                                                        | 99.5   | 99.9   | 99.6   | 99.5   | 99.6   | 99.7   | 96.7   | 97.9   | 96.3    | 96.6   |
